# Supplementary figures and images for: Dasatinib impairs long-term expansion of leukemic progenitors in a subset of acute myeloid leukemia cases
Source: PubMed Central journal article supplement — Ann Hematol. 2010 Apr 13;89(9):861–71. doi: 10.1007/s00277-010-0948-7 (PMC2908401; doi:10.1007/s00277-010-0948-7), 2010-04-13

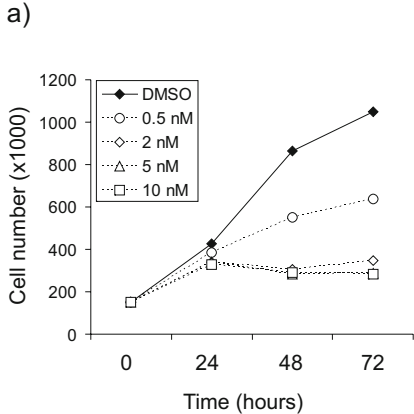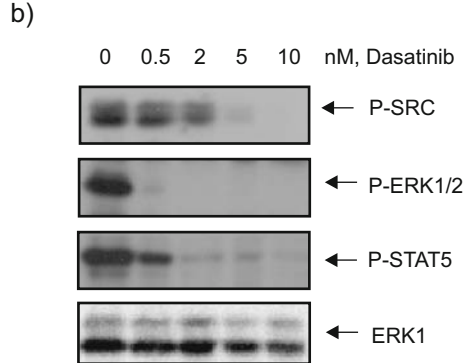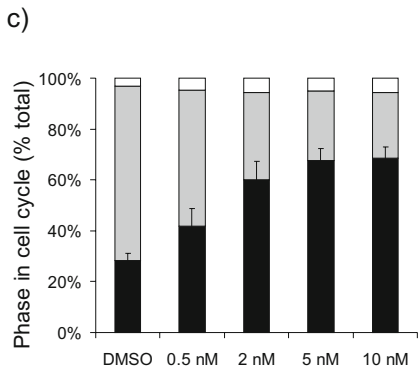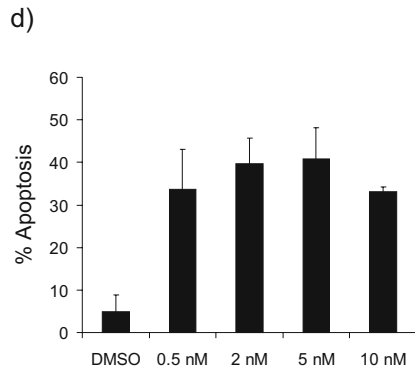

Supplement: 277_2010_948_MOESM1_ESM.pdf [file 277_2010_948_MOESM1_ESM.pdf]
